# Supplementary material
Source: Springer Nature journal article supplement (https://www.springermedizin.de/resource/supplementary/13045_2013_313_MOESM1_ESM.pdf/9661120)
Supplement: MOESM1 [file 9661120]

# STIMULATORY GROWTH FACTORS

Erythropoietin (EPO), GCSF, GMCSF, TPO, IL-3, SCF

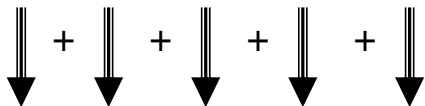

## HEMATOPOIESIS

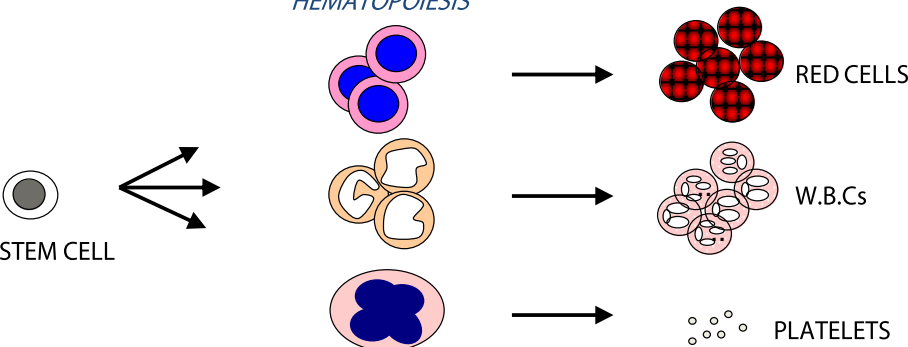

## PROGENITORS

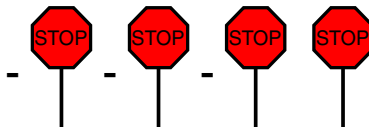

## INHIBITORY CYTOKINES

TNF, TGF, IL-6, IL-1, Interferons
